# Supplementary material for: The Effect of Mirid Density on Volatile-Mediated Foraging Behaviour of Apolygus lucorum and Peristenus spretus
Source: MDPI journal article supplement (doi:10.3390/insects12100870), 2021-09-25
Supplement: s1 [file s1]

**Table S1. Volatile compounds released by differently infested cotton plants collected at the period from 17:00 PM to 21:00 PM.** Volatile compounds collected from the headspace of control cotton plants (CK), plants infested with 1 miridae (1 bug), plants infested with 2 miridae (2 bugs), plants infested with 4 miridae (4 bugs), plants infested with 8 miridae (8 bugs). The values represent the mean percentages  $\pm$  SE of the peak area relative to the peak area of the internal standard. Letters following each value in the same row indicate significant differences between rice plant treatments based on one-way ANOVA followed Tukey HSD test ( $P < 0.05$ ).

| Peak no. | Volatile                                  | CK                  | 1 bug                | 2 bugs                | 4 bugs              | 8bugs               | p       |
|----------|-------------------------------------------|---------------------|----------------------|-----------------------|---------------------|---------------------|---------|
| 1        | ethylbenzene <sup>1</sup>                 | 30.56 $\pm$ 3.24b   | 32.89 $\pm$ 6.19b    | 29.45 $\pm$ 6.68b     | 29.57 $\pm$ 3.12b   | 63.95 $\pm$ 6.20a   | P<0.05  |
| 2        | 1,3-xylene <sup>1</sup>                   | 16.49 $\pm$ 8.34ab  | 24.26 $\pm$ 7.73a    | 22.60 $\pm$ 3.22a     | 9.35 $\pm$ 0.91b    | 14.34 $\pm$ 0.85ab  | P<0.05  |
| 3        | n-nonane <sup>1</sup>                     | 67.56 $\pm$ 9.66c   | 69.36 $\pm$ 0.92bc   | 74.98 $\pm$ 1.96bc    | 78.96 $\pm$ 1.20b   | 102.7 $\pm$ 5.11a   | P<0.05  |
| 4        | $\alpha$ -pinene <sup>2</sup>             | 3.27 $\pm$ 1.36a    | 4.87 $\pm$ 1.41a     | 4.00 $\pm$ 0.74a      | 3.82 $\pm$ 0.38a    | 4.60 $\pm$ 0.26a    | P=0.194 |
| 5        | benzaldehyde <sup>2</sup>                 | 14.45 $\pm$ 4.71b   | 10.66 $\pm$ 1.93b    | 31.38 $\pm$ 5.01a     | 28.95 $\pm$ 3.10a   | 13.15 $\pm$ 1.98b   | P<0.05  |
| 6        | (E)-2-hexenal <sup>2</sup>                | 15.88 $\pm$ 1.66c   | 15.32 $\pm$ 0.56c    | 27.96 $\pm$ 1.51a     | 21.76 $\pm$ 2.26b   | 6.73 $\pm$ 1.15d    | P<0.05  |
| 7        | $\beta$ -myrcene <sup>2</sup>             | -                   | -                    | 8.32 $\pm$ 3.03       | 7.18 $\pm$ 1.72     | 1.13 $\pm$ 0.58     |         |
| 8        | 6-methyl-5-hepten-2-one <sup>2</sup>      | -                   | 19.87 $\pm$ 5.53     | 14.86 $\pm$ 8.62      | 11.05 $\pm$ 1.78    | 12.65 $\pm$ 1.29    |         |
| 9        | decane <sup>1</sup>                       | 57.76 $\pm$ 9.72a   | 54.45 $\pm$ 4.01a    | 65.55 $\pm$ 3.79a     | 62.19 $\pm$ 2.68a   | 63.18 $\pm$ 11.98a  | P=0.268 |
| 10       | octanal <sup>2</sup>                      | 23.98 $\pm$ 3.39b   | 34.16 $\pm$ 17.79b   | 55.04 $\pm$ 5.40a     | 65.25 $\pm$ 5.57a   | 24.74 $\pm$ 5.34b   | P<0.05  |
| 11       | terpinene <sup>1</sup>                    | -                   | 0.85 $\pm$ 0.30      | 2.55 $\pm$ 0.98       | 2.36 $\pm$ 0.57     | 3.52 $\pm$ 1.12     |         |
| 12       | limonene <sup>2</sup>                     | -                   | 2.02 $\pm$ 0.95      | 4.59 $\pm$ 0.70       | 3.76 $\pm$ 0.31     | 2.24 $\pm$ 0.90     |         |
| 13       | (Z)-3-hexen-1-yl acetate <sup>2</sup>     | 11.08 $\pm$ 3.40b   | 9.24 $\pm$ 2.07b     | 44.02 $\pm$ 24.24a    | 33.56 $\pm$ 2.16a   | 10.96 $\pm$ 1.73b   | P<0.05  |
| 14       | (E)- $\beta$ -ocimene <sup>2</sup>        | 7.99 $\pm$ 2.06c    | 16.62 $\pm$ 5.81c    | 13.16 $\pm$ 6.55c     | 78.08 $\pm$ 18.30a  | 50.64 $\pm$ 7.03b   | P<0.05  |
| 15       | acetophenone <sup>2</sup>                 | 12.32 $\pm$ 4.62a   | 13.32 $\pm$ 0.55a    | 10.36 $\pm$ 0.36a     | 11.46 $\pm$ 1.03a   | 8.5 $\pm$ 4.58a     | P=0.231 |
| 16       | linalool oxide <sup>2</sup>               | -                   | 11.40 $\pm$ 2.97     | 12.99 $\pm$ 2.66      | 12.21 $\pm$ 0.95    | 10.95 $\pm$ 5.18    |         |
| 17       | linalool <sup>1</sup>                     | 19.91 $\pm$ 0.75a   | 17.11 $\pm$ 0.81a    | 20.57 $\pm$ 2.05a     | 19.60 $\pm$ 2.31a   | 17.72 $\pm$ 1.53a   | P=0.236 |
| 18       | nonanal <sup>1</sup>                      | 91.08 $\pm$ 20.38b  | 87.85 $\pm$ 24.74b   | 207.69 $\pm$ 28.14a   | 209.92 $\pm$ 11.89a | 79.45 $\pm$ 13.81b  | P<0.05  |
| 19       | DMNT <sup>2,a</sup>                       | 18.59 $\pm$ 5.97c   | 24.41 $\pm$ 4.89bc   | 21.42 $\pm$ 5.23c     | 40.28 $\pm$ 2.00a   | 30.63 $\pm$ 3.30b   | P<0.05  |
| 20       | hexenyl butyrate <sup>2</sup>             | -                   | 6.75 $\pm$ 1.79      | 3.52 $\pm$ 1.29       | 3.82 $\pm$ 1.78     | 3.66 $\pm$ 0.66     |         |
| 21       | (4Z)-4-hexenyl butylate <sup>3</sup>      | -                   | 11.29 $\pm$ 1.20     | 79.22 $\pm$ 11.14     | 72.76 $\pm$ 9.38    | 12.34 $\pm$ 3.02    |         |
| 22       | dodecane <sup>1</sup>                     | 355.28 $\pm$ 75.04d | 408.65 $\pm$ 82.49cd | 542.55 $\pm$ 130.75bc | 623.25 $\pm$ 26.62b | 763.16 $\pm$ 82.99a | P<0.05  |
| 23       | decanal <sup>1</sup>                      | 108.14 $\pm$ 29.48b | 60.55 $\pm$ 32.69bc  | 219.93 $\pm$ 41.90a   | 235.25 $\pm$ 43.93a | 38.30 $\pm$ 14.75c  | P<0.05  |
| 24       | (2E)-2-hexen-1-yl propanoate <sup>3</sup> | 7.01 $\pm$ 2.09b    | 13.60 $\pm$ 3.24a    | 11.99 $\pm$ 1.18ab    | 11.88 $\pm$ 1.22ab  | 15.61 $\pm$ 4.08a   | P<0.05  |

|    |                                           |              |             |              |              |             |         |
|----|-------------------------------------------|--------------|-------------|--------------|--------------|-------------|---------|
| 25 | tridecane <sup>1</sup>                    | 14.97±4.43a  | 15.44±0.66a | 20.38±2.43a  | 18.30±1.70a  | 16.28±2.34a | P=0.056 |
| 26 | unknown                                   | -            | -           | -            | 10.70±1.18   | 10.29±4.25  |         |
| 27 | (E)- $\beta$ -caryophyllene <sup>2</sup>  | 26.64±9.32bc | 20.95±0.21c | 36.25±4.73a  | 30.73±2.10ab | 1.25±0.39d  | P<0.05  |
| 28 | (E)- $\alpha$ -caryophyllene <sup>2</sup> | 15.78±5.09c  | 9.37±5.06c  | 40.75±8.91a  | 29.78±1.04b  | 8.65±3.17c  | P<0.05  |
| 29 | $\alpha$ -farnesene <sup>2</sup>          | -            | -           | 20.59±3.91   | 19.35±0.99   | 4.15±1.12   |         |
| 30 | (+)- $\delta$ -cadinene <sup>2</sup>      | -            | -           | 192.24±49.07 | 174.39±40.12 | 6.13±2.90   |         |
| 31 | nerolidol <sup>2</sup>                    | -            | 1.24±1.09   | 12.17±2.20   | 10.87±1.22   | 2.95±2.56   |         |

**Table S2. Volatile compounds released by differently infested cotton plants collected at the period from 10:00 PM to 14:00 PM.** Volatile compounds collected from the headspace of control cotton plants (CK), plants infested with 1 miridae (1 bug), plants infested with 2 miridae (2 bugs), plants infested with 4 miridae (4 bugs), plants infested with 8 miridae (8 bugs). The values represent the mean percentages  $\pm$  SE of the peak area relative to the peak area of the internal standard. Letters following each value in the same row indicate significant differences between rice plant treatments based on one-way ANOVA followed Tukey HSD test (P<0.05).

| Peak no. | Volatile                              | CK            | 1 bug        | 2 bugs       | 4 bugs      | 8bugs        | p       |
|----------|---------------------------------------|---------------|--------------|--------------|-------------|--------------|---------|
| 1        | ethylbenzene <sup>1</sup>             | 14.89±2.33c   | 18.73±3.49bc | 15.97±4.00c  | 24.11±2.87b | 31.24±2.21a  | P<0.05  |
| 2        | 1,3-xylene <sup>1</sup>               | 7.41±2.49b    | 7.09±0.68b   | 7.06±1.75b   | 10.06±1.55b | 15.25±5.05a  | P<0.05  |
| 3        | n-nonane <sup>1</sup>                 | 67.72±3.55d   | 72.25±2.22cd | 76.41±3.64c  | 87.14±6.02b | 94.95±4.43a  | P<0.05  |
| 4        | $\alpha$ -pinene <sup>2</sup>         | 3.38±1.10a    | 4.15±0.70a   | 3.80±0.66a   | 5.74±1.39a  | 5.38±2.56a   | P=0.151 |
| 5        | benzaldehyde <sup>2</sup>             | 16.26±2.39b   | 19.73±4.54b  | 16.92±1.64b  | 37.56±4.39a | 17.63±7.42b  | P<0.05  |
| 6        | (E)-2-hexenal <sup>2</sup>            | 16.36±1.14b   | 8.36±3.22c   | 17.68±4.49b  | 24.79±2.38a | 6.43±2.49c   | P<0.05  |
| 7        | $\beta$ -myrcene <sup>2</sup>         | -             | 4.94±1.17    | 4.83±1.32    | 6.86±1.05   | 2.97±0.72    |         |
| 8        | 6-methyl-5-hepten-2-one <sup>2</sup>  | 18.07±7.74a   | 23.06±4.75a  | 16.20±8.21a  | 26.75±7.24a | 25.00±2.95a  | P=0.157 |
| 9        | decane <sup>1</sup>                   | 61.47±6.00b   | 55.57±10.92b | 54.20±3.74b  | 67.59±4.72b | 83.04±5.81a  | P<0.05  |
| 10       | octanal <sup>2</sup>                  | 42.95±11.76b  | 51.20±19.61b | 57.19±19.41b | 97.05±4.91a | 41.28±22.80b | P<0.05  |
| 11       | terpinene <sup>1</sup>                | -             | -            | 2.74±0.64    | 4.04±0.28   | 1.74±0.70    |         |
| 12       | limonene <sup>2</sup>                 | -             | 0.93±0.55    | 3.46±0.83    | 4.97±0.45   | 2.18±0.48    |         |
| 13       | (Z)-3-hexen-1-yl acetate <sup>2</sup> | 29.68±13.39bc | 15.77±3.89c  | 44.12±10.80b | 87.86±3.18a | 100.36±7.72a | P<0.05  |

|    |                                                    |                |                |                |               |               |         |
|----|----------------------------------------------------|----------------|----------------|----------------|---------------|---------------|---------|
| 14 | ( <i>E</i> )- $\beta$ -ocimene <sup>2</sup>        | 11.80±2.90b    | 30.51±17.83b   | 14.95±7.23b    | 93.47±10.52a  | 124.38±48.90a | P<0.05  |
| 15 | acetophenone <sup>2</sup>                          | 11.15±1.52a    | 7.94±1.25a     | 11.31±0.87a    | 11.07±0.65a   | 9.47±2.65a    | P=0.052 |
| 16 | linalool oxide <sup>2</sup>                        | -              | 9.63±1.47      | 12.10±3.16     | 15.31±1.66    | 8.68±3.02     |         |
| 17 | linalool <sup>1</sup>                              | 21.73±2.25ab   | 16.45±1.41b    | 19.27±3.16ab   | 22.84±4.83a   | 6.10±2.25c    | P<0.05  |
| 18 | nonanal <sup>1</sup>                               | 157.81±30.19bc | 100.91±27.15cd | 194.23±48.92b  | 320.02±23.65a | 74.05±36.42d  | P<0.05  |
| 19 | DMNT <sup>2,a</sup>                                | 29.17±10.29b   | 29.65±4.47b    | 18.43±4.29c    | 58.14±2.66a   | 45.81±17.75ab | P<0.05  |
| 20 | hexenyl butyrate <sup>2</sup>                      | -              | 2.66±0.86      | 3.61±1.57      | 5.75±1.47     | 6.50±4.46     |         |
| 21 | (4 <i>Z</i> )-4-hexenyl butylate <sup>3</sup>      | 67.90±16.74b   | 65.76±10.49b   | 79.80±25.01b   | 118.52±24.55a | 21.10±11.00c  | P<0.05  |
| 22 | dodecane <sup>1</sup>                              | 530.14±117.92a | 471.67±108.98a | 602.80±151.50a | 427.29±15.75a | 552.72±63.74a | P=0.185 |
| 23 | decanal <sup>1</sup>                               | 232.76±67.27b  | 250.05±8.3b    | 249.40±99.78b  | 386.49±94.04a | 32.10±18.28c  |         |
| 24 | (2 <i>E</i> )-2-hexen-1-yl propanoate <sup>3</sup> | 8.16±1.84b     | 9.57±2.23b     | 14.11±5.00ab   | 16.74±2.54a   | 9.35±2.83b    | P<0.05  |
| 25 | tridecane <sup>1</sup>                             | 11.38±3.44b    | 13.22±3.12b    | 13.16±1.76b    | 13.27±1.13b   | 36.56±11.34a  | P<0.05  |
| 26 | unknown                                            | -              | -              | 3.31±0.94      | 6.94±2.00     | 9.82±2.83     |         |
| 27 | ( <i>E</i> )- $\beta$ -caryophyllene <sup>2</sup>  | 19.84±7.60c    | 23.38±2.15bc   | 31.05±5.74b    | 43.00±1.07a   | 1.22±0.74d    | P<0.05  |
| 28 | ( <i>E</i> )- $\alpha$ -caryophyllene <sup>2</sup> | -              | 9.40±5.64      | 33.61±5.53     | 44.66±1.96    | 6.70±2.65     |         |
| 29 | $\alpha$ -farnesene <sup>2</sup>                   | -              | -              | 14.82±4.32     | 26.98±2.02    | 3.68±1.89     |         |
| 30 | (+)- $\delta$ -cadinene <sup>2</sup>               | -              | -              | 175.75±37.18   | 242.55±15.78  | 20.58±6.78    |         |
| 31 | nerolidol <sup>2</sup>                             | -              | 4.49±0.64      | 13.97±1.26     | 14.82±4.19    | 37.06±13.32   |         |

"1" comparing their retention times and mass spectra to authentic standards;

"2" comparing their mass spectra and retention indices calculated relatively to the C8-C20 n-alkanes on the DB-5 column;

"3" comparing their mass spectra in the mass spectra library NIST 2014;

"a" DMNT = (3*E*)-4,8-dimethyl-1,3,7-nonatriene;

"-" indicates that the concentration of the volatile was below the detection level;

"unknown" were the compounds that were not confirmed with authentic standards.
